# Supplementary material
Source: ML conference proceedings conference paper supplement (https://openaccess.thecvf.com/content/ICCV2025/html/Park_Know_No_Better_ICCV_2025_paper.html)
Supplement: Supplementary file 1 [file Park_Know_No_Better_ICCV_2025_supplemental.pdf]

# Know “No” Better: A Data-Driven Approach for Enhancing Negation Awareness in CLIP

## Supplementary Material

### A. OpenCLIP Training Dataset Statistics

In this section, we provide additional statistics on negation-related terms in the datasets used for OpenCLIP [1] training, complementing the analysis presented in Sec. 2.2. Specifically, we report the frequency of the negation terms “no,” “not,” and “without” in the DataComp-1B [3] and LAION-2B [13] datasets in Tab. 1. Both datasets exhibit trends similar to those observed in LAION-400M [13]. These findings are consistent with the statistics we reported for LAION-400M, highlighting the insufficient representation of negation in datasets used for OpenCLIP pre-training.

Table 1. Proportion of negation in captions and words within DataComp-1B and LAION-2B.

| Dataset         | Level   | Total Count | Neg. Count | Neg. Ratio |
|-----------------|---------|-------------|------------|------------|
| DataComp-1B [3] | Caption | 1.38B       | 10.4M      | 0.75%      |
|                 | Word    | 13.8B       | 11.8M      | 0.09%      |
| LAION-2B [13]   | Caption | 2.08B       | 19.3M      | 0.93%      |
|                 | Word    | 21.9B       | 21.1M      | 0.10%      |

### B. More Ablation Studies

In addition to the results presented in Sec. 4.3, we further evaluate the impact of using original captions instead of the generated captions for fine-tuning on the same set of images.

The results shown in Tab. 2 demonstrate that incorporating our generated captions consistently achieves the highest performance on both the VALSE and NegRefCOCOg benchmarks, across all architectures. Notably, while fine-tuning with original captions can also lead to degradation, as observed in the ViT-B/32 architecture on the VALSE benchmark, fine-tuning with our generated captions consistently improves performance. This underscores the efficacy of our data generation pipeline in enhancing negation comprehension.

### C. Data Generation Pipelines

We provide additional details on the two data generation pipelines discussed in Sec. 3.1 and Sec. 3.2 of the main paper. Specifically, we include the prompts used with the LLM and MLLM during data generation and provide examples of the generated image-caption pairs. The prompts used in the two pipelines are presented in Tab. 3 and Tab. 4 respectively.

We provide qualitative examples of the data generated by our proposed data generation pipelines in Fig. 1. As shown

Table 2. More ablation results on different data configurations.

| Arch.              | Data Config.       | VALSE $\uparrow$ | NegRefCOCOg $\uparrow$ |
|--------------------|--------------------|------------------|------------------------|
| ViT-B/32           | Original           | 70.97            | 57.73                  |
|                    | + Original Caption | 68.35            | 60.45                  |
|                    | + Our Caption      | <b>80.15</b>     | <b>64.09</b>           |
| ViT-B/16           | Original           | 69.48            | 58.64                  |
|                    | + Original Caption | 73.97            | 60.91                  |
|                    | + Our Caption      | <b>80.52</b>     | <b>64.32</b>           |
| ViT-L/14           | Original           | 66.85            | 57.27                  |
|                    | + Original Caption | 74.91            | 60.00                  |
|                    | + Our Caption      | <b>79.59</b>     | <b>62.95</b>           |
| ViT-L/14<br>@336px | Original           | 64.61            | 57.05                  |
|                    | + Original Caption | 73.97            | 58.41                  |
|                    | + Our Caption      | <b>80.34</b>     | <b>62.95</b>           |

in Fig. 1 (a), captions generated by Pipeline 1 accurately incorporate the absence of objects such as “car,” “ball,” or “curtains,” which are contextually plausible within the scene. This process enhances the training data with negation terms while maintaining alignment with the image content. Fig. 1 (b) demonstrates how Pipeline 2 captures a broader scope of negation, such as negating actions (e.g., “not swimming”), adjectival phrases (e.g., “not in the wild”). These examples highlight the flexibility and effectiveness of this pipeline in generating rich negation-inclusive captions.

### D. NegRefCOCOg Benchmark

In this section, we elaborate details on the construction of our proposed NegRefCOCOg benchmark in Sec. 3.3.

**Selection Criteria** To construct NegRefCOCOg, we begin by selecting samples from the RefCOCOg [17] dataset that meet the following criteria:

- The original image patch  $P_o^+$ , corresponding to the negation-inclusive prompt  $T$ , has a height and width of at least 100 pixels.
- At least one other image patch belonging to the same category as  $P_o^+$  has a height and width of at least 100 pixels and does not overlap with  $P_o^+$ . We then designate one of these patches as  $P_o^-$ .

**Image Patch Maximization** To ensure alignment with  $T$ , we maximize the sizes of  $P_o^+$  and  $P_o^-$  under the following constraints. As a result, we obtain the final patches,  $P^+$  and

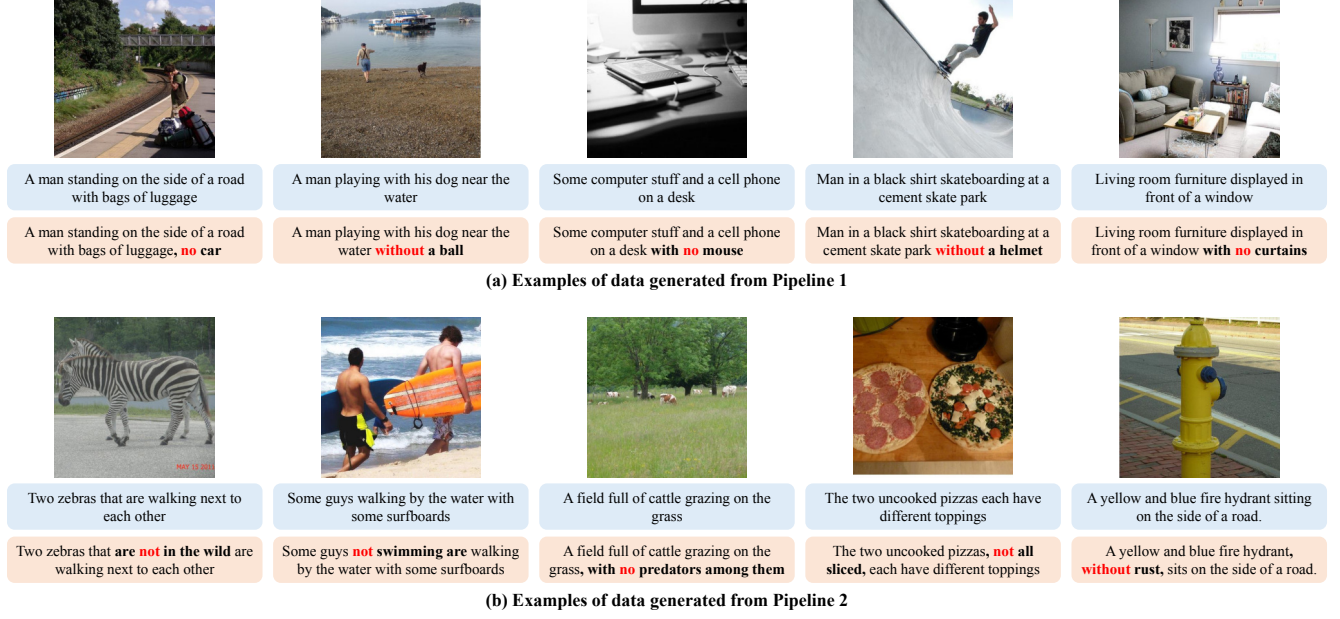

Figure 1. Examples of data generated by our proposed pipelines. (a) demonstrates captions augmented through Pipeline 1, and (b) illustrates captions augmented through Pipeline 2. **Blue boxes** represent the original captions, and **red boxes** show the augmented captions with negation terms.

Table 3. Prompts used in our Pipeline 1.

| Step 1: Extracting Plausible Object from Caption |                                                                                                                                                              |
|--------------------------------------------------|--------------------------------------------------------------------------------------------------------------------------------------------------------------|
| <b>System</b>                                    | You are a helpful chatbot that answers with only one word.                                                                                                   |
| <b>User</b>                                      | Name an object that is not mentioned in the caption, but is likely to be in the image corresponding to the caption '{caption}'.                              |
| <b>LLM</b>                                       | {object}.                                                                                                                                                    |
| Step 2: Verifying Object Absence with MLLM       |                                                                                                                                                              |
| <b>System</b>                                    | A chat between a curious human and an artificial intelligence assistant. The assistant gives helpful, detailed, and polite answers to the human's questions. |
| <b>User</b>                                      | <image><br>Is there {object} in this image? Answer either yes or no.                                                                                         |
| <b>MLLM</b>                                      | {yes/no}.                                                                                                                                                    |
| Step 3: Augmenting Caption with Negation         |                                                                                                                                                              |
| <b>System</b>                                    | You are a helpful chatbot that generates concise caption.                                                                                                    |
| <b>User</b>                                      | Add the absence of the {object} to the caption '{caption}'.                                                                                                  |
| <b>LLM</b>                                       | {updated.caption}.                                                                                                                                           |

Table 4. Prompts used in our Pipeline 2.

| Step 2: Augmenting Caption with Negation |                                                                                          |
|------------------------------------------|------------------------------------------------------------------------------------------|
| <b>System</b>                            | You are a helpful chatbot that generates concise caption.                                |
| <b>User</b>                              | When the answer to the question {question} is 'no', reconstruct the caption '{caption}'. |
| <b>LLM</b>                               | {updated.caption}.                                                                       |

$P^-$ , where  $P^+$  is the expanded version of  $P_o^+$  and  $P^-$  is the expanded version of  $P^-$ .

- The expanded patch must not overlap with the other patch before its maximization, which can be expressed as:

$$P^+ \cap P_o^- = \emptyset, \quad P^- \cap P_o^+ = \emptyset.$$

- Horizontal expansion is limited to the original width of the patch in each direction (left and right).
- Vertical expansion is limited to the original height of the patch in each direction (top and bottom).

We obtain 440 triplets of  $(T, P^+, P^-)$  through this process, where  $P^+$  is well-aligned with  $T$  and  $P^-$  serves as challenging hard negative for evaluation. These 440 samples form the NegRefCOCOg benchmark, which we use to evaluate the ability of models to handle negation comprehensively and accurately.

Fig. 2 illustrates examples from NegRefCOCOg. These examples demonstrate the diversity of negation scenarios in NegRefCOCOg, including object absence, action negation with various negation terms.

## E. Results on Additional Models

Our method is model-agnostic and applies to SigLIP [18], showing consistent gains on negation benchmarks while preserving general performance, as shown in Tab. 5.

Table 5. Comparison of model performance on negation and general benchmarks across different architectures of SigLIP [18].

| Model      | Arch.  | Negation Benchmarks |              | General Benchmarks |              |
|------------|--------|---------------------|--------------|--------------------|--------------|
|            |        | VALSE               | NegRefCOCOg  | ImageNet           | COCO         |
| SigLIP     | base   | 67.98               | 61.59        | <b>75.69</b>       | 72.10        |
| Neg.SigLIP |        | <b>77.15</b>        | <b>68.18</b> | 75.10              | <b>77.30</b> |
| SigLIP     | large  | 73.03               | 62.05        | 79.73              | 75.20        |
| Neg.SigLIP |        | <b>79.40</b>        | <b>67.73</b> | <b>79.76</b>       | <b>80.10</b> |
| SigLIP     | so400m | 75.47               | 63.18        | <b>82.26</b>       | 76.30        |
| Neg.SigLIP |        | <b>84.27</b>        | <b>67.05</b> | 81.68              | <b>81.70</b> |

## F. Expanded Discussion on T2I Generation

### F.1. Methods

In T2I generation, research has emerged focusing on the removal of unwanted concepts from generated images. [2, 5, 16]. These methods typically preprocess text prompts by identifying and removing negation-related components, reformulating the prompt to exclude negation. For example, given the text prompt “a panda in a forest without flowers,” LMD [5] uses an LLM to identify “flowers” as the negated object and remove it, resulting in a final layout-based prompt that retains only “a panda” and “a forest.”

In contrast, our approach directly uses the original prompt “a panda in a forest without flowers” without any preprocessing, allowing the T2I model to process negation as part of the input text. This provides a different perspective on handling negation, where the model learns to interpret negation within natural language rather than relying on preprocessing to modify the prompt.

### F.2. Evaluation

Existing methods evaluate negation comprehension in T2I models using the LMD [5] Negation benchmark, which consists of 10 prompts structured as “a realistic photo of a scene without [object]” and uses object detectors to verify object absence.

We provide evaluation results of NegationCLIP on the LMD Negation benchmark in Tab. 6. Standard SD strug-

Table 6. Results on LMD Negation benchmark.

| Method                          | LMD Negation |
|---------------------------------|--------------|
| SD                              | 20%          |
| SD w/ NegationCLIP text encoder | 94%          |
| SD + LMD [5]                    | 100%         |

gles significantly with negation, achieving only 20% accuracy, indicating that it often fails to remove the negated object. In contrast, simply replacing SD’s text encoder with NegationCLIP’s text encoder improves accuracy to 94%, successfully removing the negated object in nearly all cases. Unsurprisingly, applying LMD [5] method to SD yields perfect performance, as it heuristically removes the negation-related part from the final prompt, ensuring that the object does not appear in the generated image.

However, while the LMD Negation benchmark effectively evaluates object removal, it does not account for negation beyond object presence or absence, such as actions and attributes. While it can determine whether an object has been successfully removed, it fails to capture cases where negation modifies an entity’s state (e.g., *a dog not running*) or its properties (e.g., *a not blue sphere*). To address this limitation, we introduce more diverse prompts that encompass negation in objects, actions, and attributes as shown in Tab. 8).

Since object detectors are insufficient for evaluating these more complex negation cases, we drew inspiration from the TIFA [4] metric’s MLLM-based VQA system and introduce the Neg Score as a more comprehensive evaluation measure in Sec 5.2.

## G. Experiment Details

### G.1. CelebA Classification

In Tab. 7, we provide attribute-specific prompts for all 40 attributes of CelebA [7] in our experiment in Sec. 2.1. NegationCLIP improves the accuracy from 60.8% to 64.0%, whereas CoN-CLIP [14] sees a decline to 60.6%. We note that achieving significantly higher accuracy on CelebA is inherently challenging, as the dataset includes subjective attributes (e.g., *attractive*).

### G.2. Fine-Tuning Configuration

We detail the fine-tuning configurations used to train our CLIP [11] models with the data generated from the proposed data generation pipeline.

The generated dataset was split into 80% for training and 20% for validation. We used batch sizes of 512 for ViT-B/32, 256 for ViT-B/16, 128 for both ViT-L/14 and ViT-L@336px, and 64 for ViT-BigG/14 which we fine-tuned specifically for the text-to-image (T2I) generation experiment using SDXL-1.0 [10] in Sec. 5.1. All models were

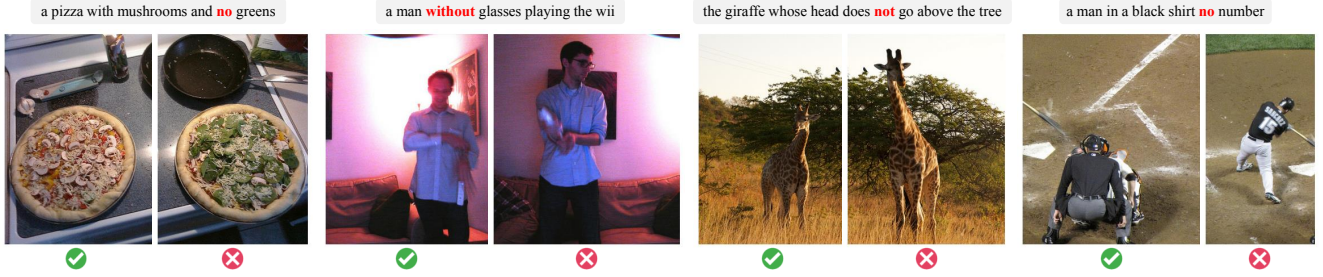

Figure 2. Examples from the proposed NegRefCOCOg benchmark. Each example consists of a textual description containing negation (top) and two image patches: the correct patch aligned with the negated description (green checkmark) and the incorrect patch representing a challenging hard negative (red cross).

fine-tuned using a single NVIDIA L40 GPU.

### G.3. T2I Generation

We provide details on T2I experiments shown in Sec. 5.1.

For generating negation-inclusive prompts, we utilized ChatGPT [9] to construct 107 prompts. To evaluate whether the generated images accurately reflected the given prompts, we employed ChatGPT to create two corresponding questions for each prompt. The first question was designed to assess whether the subject of the prompt was correctly generated, with the expected answer being “yes.” The second question aimed to verify whether the negation-related aspect was properly removed, with the expected answer being “no.” For example, for the prompt “a man not wearing a hat,” the two generated questions were “Is this a man?” and “Is the man wearing a hat?”. The complete list of prompts and their corresponding questions is provided in Tab. 8.

In SD-1.4 [12], we replaced its CLIP ViT-L/14 text encoder with CoN-CLIP text encoder and our fine-tuned negation-aware text encoder of the same architecture. For SDXL, which employs two text encoders (CLIP ViT-L/14 and CLIP ViT-BigG/14), we substituted both encoders with our fine-tuned versions.

### G.4. Referring Image Segmentation

For our experiments in referring image segmentation in Sec. 5.2, we utilized the publicly available weight of CLIPSeg [8] trained on the PhraseCut [15] dataset as our baseline. Without any additional training, we replaced the text encoder in the CLIPSeg architecture with CoN-CLIP ViT-B/16 text encoder and our fine-tuned CLIP ViT-B/16 text encoder.

We followed CLIPSeg to determine the threshold values for binary segmentation, setting it to 0.3 for experiments on the PhraseCut dataset and 0.1 for experiments on RefCOCOg (Neg), which is based on the COCO [6] dataset.

## H. Additional Qualitative Results

Fig. 3 demonstrates additional qualitative examples from T2I task. For each prompt, we include all images generated using 5 different random seeds.

For both SDXL [10] and SD-1.4 [12], substituting the original CLIP text encoder with NegationCLIP text encoder improves the ability to accurately reflect negation in generated images. Notably, SD-1.4, which uses only one text encoder, maintains high-quality image generation despite the substitution, highlighting that the fine-tuned NegationCLIP text encoder preserves overall image quality while enhancing negation comprehension.

Certain challenging prompts, such as “a city without buildings” or “a museum without exhibits,” expose limitations in the model’s ability to remove concepts with strong biases (e.g., buildings in city contexts, exhibits in museum contexts). These limitations may stem from the limited representation of such cases in the training data for generative models. Identifying the underlying causes of these limitations and addressing them constitutes an important direction for future work.

Table 7. CelebA attribute-specific prompts and balanced accuracy

| Attribute           | Positive Prompt                              | Negative Prompt                                  |
|---------------------|----------------------------------------------|--------------------------------------------------|
| 5 o Clock Shadow    | a photo of a person with a 5 o'clock shadow  | a photo of a person with no 5 o'clock shadow     |
| Arched Eyebrows     | a photo of a person with arched eyebrows     | a photo of a person with not arched eyebrows     |
| Attractive          | a photo of an attractive person              | a photo of a not attractive person               |
| Bags Under Eyes     | a photo of a person with bags under eyes     | a photo of a person with no bags under eyes      |
| Bald                | a photo of a bald person                     | a photo of a not bald person                     |
| Bangs               | a photo of a person with bangs               | a photo of a person with no bangs                |
| Big Lips            | a photo of a person with big lips            | a photo of a person with not big lips            |
| Big Nose            | a photo of a person with a big nose          | a photo of a person with a not big nose          |
| Black Hair          | a photo of a person with black hair          | a photo of a person with not black hair          |
| Blond Hair          | a photo of a person with blond hair          | a photo of a person with not blond hair          |
| Blurry              | a blurry photo of a person                   | a not blurry photo of a person                   |
| Brown Hair          | a photo of a person with brown hair          | a photo of a person with not brown hair          |
| Bushy Eyebrows      | a photo of a person with bushy eyebrows      | a photo of a person with not bushy eyebrows      |
| Chubby              | a photo of a chubby person                   | a photo of a not chubby person                   |
| Double Chin         | a photo of a person with a double chin       | a photo of a person with no double chin          |
| Eyeglasses          | a photo of a person wearing glasses          | a photo of a person not wearing glasses          |
| Goatee              | a photo of a person with goatee              | a photo of a person with no goatee               |
| Gray Hair           | a photo of a person with gray hair           | a photo of a person with not gray hair           |
| Heavy Makeup        | a photo of a person with heavy makeup        | a photo of a person with no heavy makeup         |
| High Cheekbones     | a photo of a person with high cheekbones     | a photo of a person with not high cheekbones     |
| Male                | a photo of a male                            | a photo of a not male                            |
| Mouth Slightly Open | a photo of a person with mouth slightly open | a photo of a person with mouth not slightly open |
| Mustache            | a photo of a person with mustache            | a photo of a person with no mustache             |
| Narrow Eyes         | a photo of a person with narrow eyes         | a photo of a person with not narrow eyes         |
| No Beard            | a photo of a person with no beard            | a photo of a person with beard                   |
| Oval Face           | a photo of a person with oval face           | a photo of a person with not oval face           |
| Pale Skin           | a photo of a person with pale skin           | a photo of a person with not pale skin           |
| Pointy Nose         | a photo of a person with a pointy nose       | a photo of a person with not a pointy nose       |
| Receding Hairline   | a photo of a person with a receding hairline | a photo of a person with no receding hairline    |
| Rosy Cheeks         | a photo of a person with rosy cheeks         | a photo of a person with not rosy cheeks         |
| Sideburns           | a photo of a person with sideburns           | a photo of a person with no sideburns            |
| Smiling             | a photo of a person smiling                  | a photo of a person not smiling                  |
| Straight Hair       | a photo of a person with straight hair       | a photo of a person with not straight hair       |
| Wavy Hair           | a photo of a person with wavy hair           | a photo of a person with not wavy hair           |
| Wearing Earrings    | a photo of a person wearing earrings         | a photo of a person not wearing earrings         |
| Wearing Hat         | a photo of a person wearing a hat            | a photo of a person not wearing a hat            |
| Wearing Lipstick    | a photo of a person wearing lipstick         | a photo of a person not wearing lipstick         |
| Wearing Necklace    | a photo of a person wearing a necklace       | a photo of a person not wearing a necklace       |
| Wearing Necktie     | a photo of a person wearing a necktie        | a photo of a person not wearing a necktie        |
| Young               | a photo of a young person                    | a photo of a not young person                    |

Table 8. Text-to-image generation prompts and corresponding questions.

| Prompt                             | Question 1               | Question 2                                 | Prompt                           | Question 1             | Question 2                             |
|------------------------------------|--------------------------|--------------------------------------------|----------------------------------|------------------------|----------------------------------------|
| a man not wearing a hat            | Is this a man?           | Is the man wearing a hat?                  | a woman not wearing a mask       | Is this a woman?       | Is the woman wearing a mask?           |
| a dog not running                  | Is this a dog?           | Is the dog running?                        | a bird not flying                | Is this a bird?        | Is the bird flying?                    |
| a not white cat                    | Is this a cat?           | Is the cat white?                          | a not blue sphere                | Is this a sphere?      | Is the sphere blue?                    |
| a room with no window              | Is this a room?          | Is there a window in the room?             | a dog without a collar           | Is this a dog?         | Does the dog have a collar?            |
| a cat with no whiskers             | Is this a cat?           | Does the cat have whiskers?                | a child not holding a toy        | Is this a child?       | Is the child holding a toy?            |
| a park with no benches             | Is this a park?          | Are there benches in the park?             | a bird not perched on a branch   | Is this a bird?        | Is the bird perched on a branch?       |
| a woman without glasses            | Is this a woman?         | Is the woman wearing glasses?              | a table with no chairs around    | Is this a table?       | Are there chairs around the table?     |
| a car not parked in the driveway   | Is this a car?           | Is the car parked in the driveway?         | a beach without any umbrellas    | Is this a beach?       | Are there umbrellas on the beach?      |
| a man with no hat                  | Is this a man?           | Is the man wearing a hat?                  | a road not crowded with cars     | Is this a road?        | Is the road crowded with cars?         |
| a garden with no flowers           | Is this a garden?        | Are there flowers in the garden?           | a person not holding an umbrella | Is this a person?      | Is the person holding an umbrella?     |
| a lake with no boats               | Is this a lake?          | Are there boats on the lake?               | a house without a roof           | Is this a house?       | Does the house have a roof?            |
| a tree not in bloom                | Is this a tree?          | Is the tree in bloom?                      | a mountain with no snow          | Is this a mountain?    | Is there snow on the mountain?         |
| a room without furniture           | Is this a room?          | Is there furniture in the room?            | a dog not barking                | Is this a dog?         | Is the dog barking?                    |
| a street with no people            | Is this a street?        | Are there people on the street?            | a kitchen without any food       | Is this a kitchen?     | Is there food in the kitchen?          |
| a cup not filled with coffee       | Is this a cup?           | Is the cup filled with coffee?             | a forest with no animals         | Is this a forest?      | Are there animals in the forest?       |
| a phone not on the table           | Is this a phone?         | Is the phone on the table?                 | a desk without a computer        | Is this a desk?        | Is there a computer on the desk?       |
| a man not wearing shoes            | Is this a man?           | Is the man wearing shoes?                  | a restaurant with no tables      | Is this a restaurant?  | Are there tables in the restaurant?    |
| a city skyline with no skyscrapers | Is this a city skyline?  | Are there skyscrapers in the city skyline? | a field without crops            | Is this a field?       | Are there crops in the field?          |
| a woman not smiling                | Is this a woman?         | Is the woman smiling?                      | a living room with no couch      | Is this a living room? | Is there a couch in the living room?   |
| a car without wheels               | Is this a car?           | Does the car have wheels?                  | a stadium with no spectators     | Is this a stadium?     | Are there spectators in the stadium?   |
| a road with no signs               | Is this a road?          | Are there signs on the road?               | a child not wearing shoes        | Is this a child?       | Is the child wearing shoes?            |
| a bridge without railings          | Is this a bridge?        | Does the bridge have railings?             | a river with no fish             | Is this a river?       | Are there fish in the river?           |
| a sky without clouds               | Is this a sky?           | Are there clouds in the sky?               | a cup with no handle             | Is this a cup?         | Does the cup have a handle?            |
| a playground with no swings        | Is this a playground?    | Are there swings in the playground?        | a man not wearing a tie          | Is this a man?         | Is the man wearing a tie?              |
| a building without windows         | Is this a building?      | Does the building have windows?            | a book with no cover             | Is this a book?        | Does the book have a cover?            |
| a shop with no customers           | Is this a shop?          | Are there customers in the shop?           | a garden without any trees       | Is this a garden?      | Are there trees in the garden?         |
| a bike not leaning against a wall  | Is this a bike?          | Is the bike leaning against a wall?        | a stage with no performers       | Is this a stage?       | Are there performers on the stage?     |
| a train station with no trains     | Is this a train station? | Are there trains at the train station?     | a museum without exhibits        | Is this a museum?      | Are there exhibits in the museum?      |
| a shelf with no books              | Is this a shelf?         | Are there books on the shelf?              | a restaurant not serving food    | Is this a restaurant?  | Is the restaurant serving food?        |
| a person with no backpack          | Is this a person?        | Does the person have a backpack?           | a market without any vendors     | Is this a market?      | Are there vendors in the market?       |
| a room not filled with light       | Is this a room?          | Is the room filled with light?             | a path with no signs             | Is this a path?        | Are there signs on the path?           |
| a school without students          | Is this a school?        | Are there students in the school?          | a car with no headlights         | Is this a car?         | Does the car have headlights?          |
| a cat without a tail               | Is this a cat?           | Does the cat have a tail?                  | a person not holding a bag       | Is this a person?      | Is the person holding a bag?           |
| a forest with no leaves            | Is this a forest?        | Are there leaves in the forest?            | a house with no doors            | Is this a house?       | Does the house have doors?             |
| a chair not facing the table       | Is this a chair?         | Is the chair facing the table?             | a bird not singing               | Is this a bird?        | Is the bird singing?                   |
| a beach without sand               | Is this a beach?         | Is there sand on the beach?                | a dog not playing fetch          | Is this a dog?         | Is the dog playing fetch?              |
| a wall with no decorations         | Is this a wall?          | Are there decorations on the wall?         | a sidewalk with no pedestrians   | Is this a sidewalk?    | Are there pedestrians on the sidewalk? |
| a man not reading a book           | Is this a man?           | Is the man reading a book?                 | a classroom with no desks        | Is this a classroom?   | Are there desks in the classroom?      |
| a street with no lights            | Is this a street?        | Are there lights on the street?            | a yard without grass             | Is this a yard?        | Is there grass in the yard?            |
| a riverbank with no trees          | Is this a riverbank?     | Are there trees on the riverbank?          | a cat not purring                | Is this a cat?         | Is the cat purring?                    |
| a boat with no sails               | Is this a boat?          | Does the boat have sails?                  | a woman not holding a purse      | Is this a woman?       | Is the woman holding a purse?          |
| a stadium with no players          | Is this a stadium?       | Are there players in the stadium?          | a sky with no stars              | Is this a sky?         | Are there stars in the sky?            |
| a store without shelves            | Is this a store?         | Are there shelves in the store?            | a man not holding a briefcase    | Is this a man?         | Is the man holding a briefcase?        |
| a city without buildings           | Is this a city?          | Are there buildings in the city?           | a painting without colors        | Is this a painting?    | Does the painting have colors?         |
| a road without any turns           | Is this a road?          | Are there turns on the road?               | a lawn with no flowers           | Is this a lawn?        | Are there flowers on the lawn?         |
| a dog not fetching a ball          | Is this a dog?           | Is the dog fetching a ball?                | a bridge without any lights      | Is this a bridge?      | Are there lights on the bridge?        |
| a car with no passengers           | Is this a car?           | Are there passengers in the car?           | a garden with no vegetables      | Is this a garden?      | Are there vegetables in the garden?    |
| a child not drinking milk          | Is this a child?         | Is the child drinking milk?                | a person without a shadow        | Is this a person?      | Does the person have a shadow?         |
| a tree with no leaves              | Is this a tree?          | Does the tree have leaves?                 | a bus stop without a bench       | Is this a bus stop?    | Is there a bench at the bus stop?      |
| a train without passengers         | Is this a train?         | Are there passengers on the train?         | a cafe with no tables            | Is this a cafe?        | Are there tables in the cafe?          |
| a photo with no people             | Is this a photo?         | Are there people in the photo?             | a street without any trees       | Is this a street?      | Are there trees on the street?         |
| a river not flowing                | Is this a river?         | Is the river flowing?                      | a mountain with no trails        | Is this a mountain?    | Are there trails on the mountain?      |
| a path without any footprints      | Is this a path?          | Are there footprints on the path?          | a field with no animals          | Is this a field?       | Are there animals in the field?        |
| a building with no entrance        | Is this a building?      | Is there an entrance to the building?      |                                  |                        |                                        |



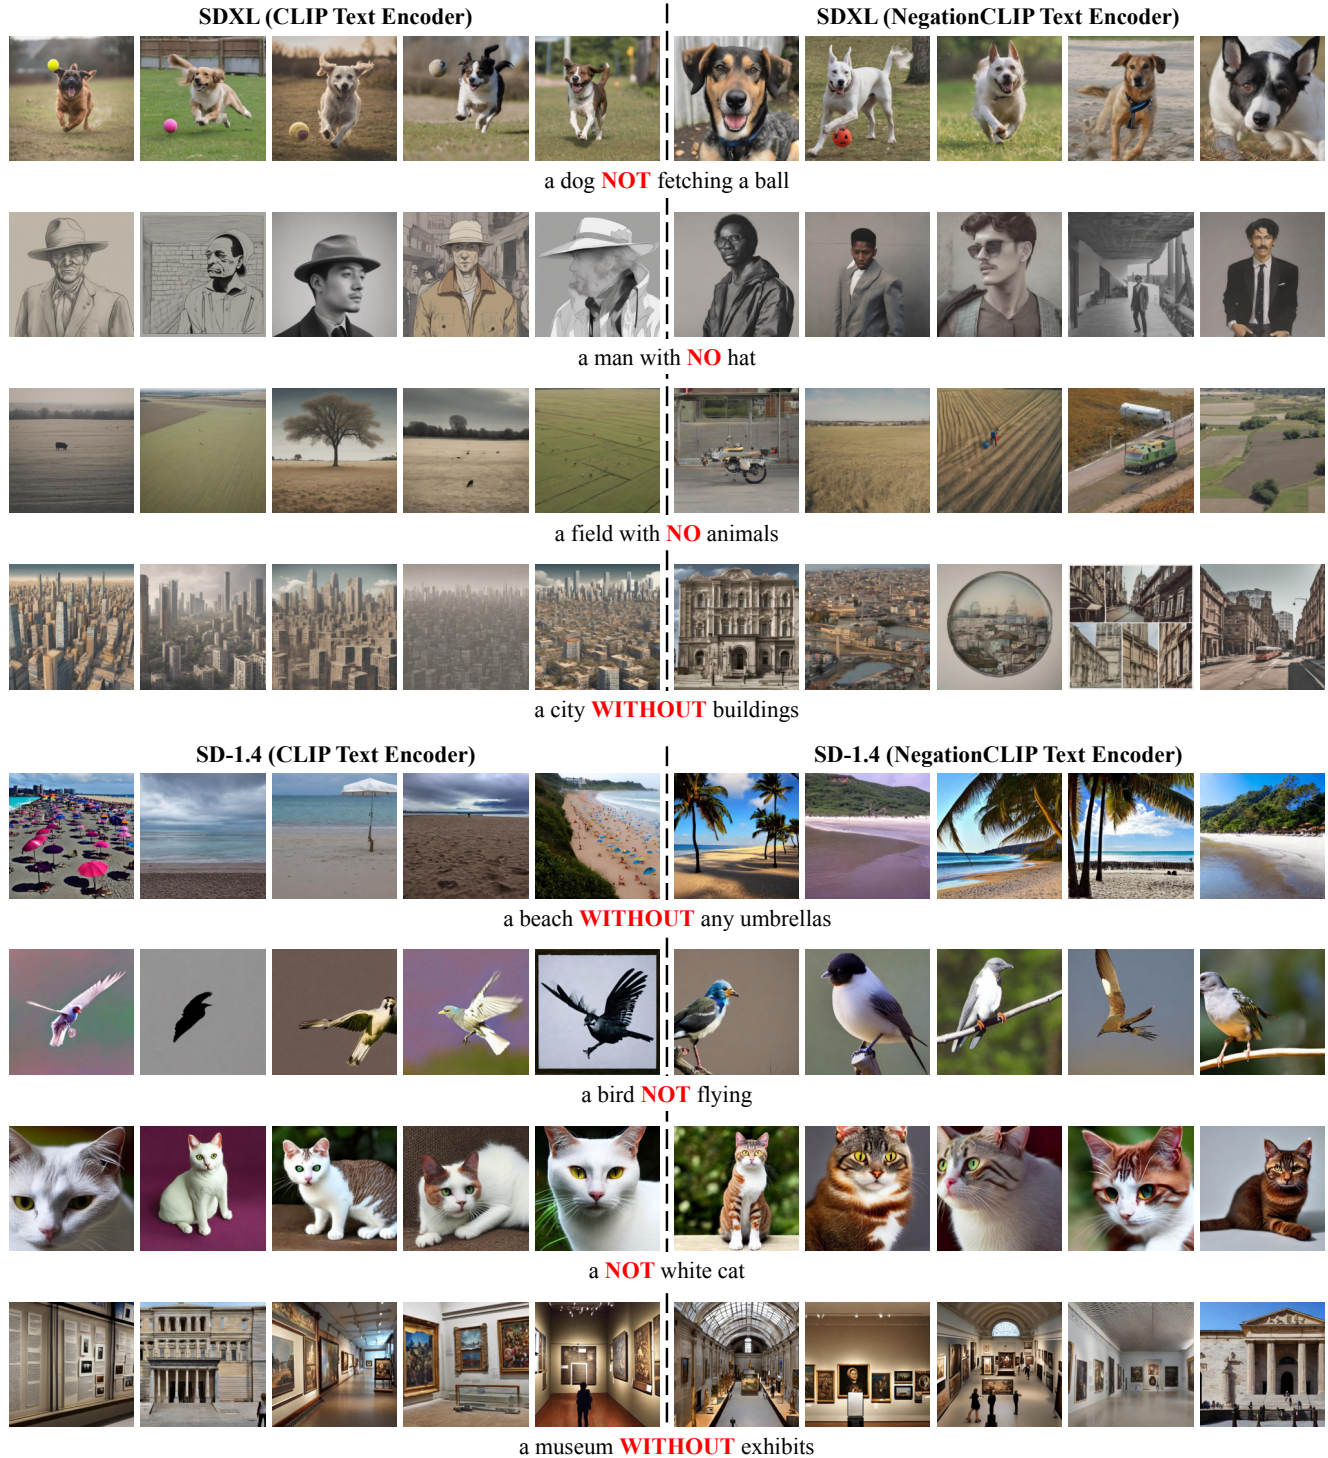

Figure 3. Additional examples for text-to-image generation tasks using Stable Diffusion XL (SDXL) [10] and Stable Diffusion 1.4 (SD-1.4) [12]. Comparisons are shown between models using the original CLIP text encoder and the fine-tuned NegationCLIP text encoder.

## References

- [1] Mehdi Cherti, Romain Beaumont, Ross Wightman, Mitchell Wortsman, Gabriel Ilharco, Cade Gordon, Christoph Schuhmann, Ludwig Schmidt, and Jenia Jitsev. Reproducible scaling laws for contrastive language-image learning. In *Proceedings of the IEEE/CVF Conference on Computer Vision and Pattern Recognition*, pages 2818–2829, 2023. [1](#)
- [2] Peiran Dong, Song Guo, Junxiao Wang, Bingjie Wang, Jiewei Zhang, and Ziming Liu. Towards test-time refusals via concept negation. *Advances in Neural Information Processing Systems*, 36, 2024. [3](#)
- [3] Samir Yitzhak Gadre, Gabriel Ilharco, Alex Fang, Jonathan Hayase, Georgios Smyrnis, Thao Nguyen, Ryan Marten, Mitchell Wortsman, Dhruva Ghosh, Jieyu Zhang, et al. Datacomp: In search of the next generation of multimodal datasets. *Advances in Neural Information Processing Systems*, 36, 2024. [1](#)
- [4] Yushi Hu, Benlin Liu, Jungo Kasai, Yizhong Wang, Mari Ostendorf, Ranjay Krishna, and Noah A Smith. Tifa: Accurate and interpretable text-to-image faithfulness evaluation with question answering. In *Proceedings of the IEEE/CVF International Conference on Computer Vision*, pages 20406–20417, 2023. [3](#)
- [5] Long Lian, Boyi Li, Adam Yala, and Trevor Darrell. Llm-grounded diffusion: Enhancing prompt understanding of text-to-image diffusion models with large language models. *arXiv preprint arXiv:2305.13655*, 2023. [3](#)
- [6] Tsung-Yi Lin, Michael Maire, Serge Belongie, James Hays, Pietro Perona, Deva Ramanan, Piotr Dollár, and C Lawrence Zitnick. Microsoft coco: Common objects in context. In *Computer Vision–ECCV 2014: 13th European Conference, Zurich, Switzerland, September 6–12, 2014, Proceedings, Part V 13*, pages 740–755. Springer, 2014. [4](#)
- [7] Ziwei Liu, Ping Luo, Xiaogang Wang, and Xiaoou Tang. Deep learning face attributes in the wild. In *Proceedings of International Conference on Computer Vision (ICCV)*, 2015. [3](#)
- [8] Timo Lüddecke and Alexander Ecker. Image segmentation using text and image prompts. In *Proceedings of the IEEE/CVF conference on computer vision and pattern recognition*, pages 7086–7096, 2022. [4](#)
- [9] OpenAI. Gpt-4 technical report, 2023. [4](#)
- [10] Dustin Podell, Zion English, Kyle Lacey, Andreas Blattmann, Tim Dockhorn, Jonas Müller, Joe Penna, and Robin Rombach. Sdxl: Improving latent diffusion models for high-resolution image synthesis. *arXiv preprint arXiv:2307.01952*, 2023. [3](#), [4](#), [7](#)
- [11] Alec Radford, Jong Wook Kim, Chris Hallacy, Aditya Ramesh, Gabriel Goh, Sandhini Agarwal, Girish Sastry, Amanda Askell, Pamela Mishkin, Jack Clark, et al. Learning transferable visual models from natural language supervision. In *International conference on machine learning*, pages 8748–8763. PMLR, 2021. [3](#)
- [12] Robin Rombach, Andreas Blattmann, Dominik Lorenz, Patrick Esser, and Björn Ommer. High-resolution image synthesis with latent diffusion models. In *Proceedings of the IEEE/CVF Conference on Computer Vision and Pattern Recognition (CVPR)*, pages 10684–10695, 2022. [4](#), [7](#)
- [13] Christoph Schuhmann, Romain Beaumont, Richard Vencu, Cade W Gordon, Ross Wightman, Mehdi Cherti, Theo Coombes, Aarush Katta, Clayton Mullis, Mitchell Wortsman, Patrick Schramowski, Srivatsa R Kundurthy, Katherine Crowson, Ludwig Schmidt, Robert Kaczmarczyk, and Jenia Jitsev. LAION-5b: An open large-scale dataset for training next generation image-text models. In *Thirty-sixth Conference on Neural Information Processing Systems Datasets and Benchmarks Track*, 2022. [1](#)
- [14] Jaisidh Singh, Ishaan Shrivastava, Mayank Vatsa, Richa Singh, and Aparna Bharati. Learn” no” to say” yes” better: Improving vision-language models via negations. *arXiv preprint arXiv:2403.20312*, 2024. [3](#)
- [15] Chenyun Wu, Zhe Lin, Scott Cohen, Trung Bui, and Subhansu Maji. Phrasecut: Language-based image segmentation in the wild. In *Proceedings of the IEEE/CVF Conference on Computer Vision and Pattern Recognition*, pages 10216–10225, 2020. [4](#)
- [16] Tsung-Han Wu, Long Lian, Joseph E Gonzalez, Boyi Li, and Trevor Darrell. Self-correcting llm-controlled diffusion models. In *Proceedings of the IEEE/CVF Conference on Computer Vision and Pattern Recognition*, pages 6327–6336, 2024. [3](#)
- [17] Licheng Yu, Patrick Poirson, Shan Yang, Alexander C Berg, and Tamara L Berg. Modeling context in referring expressions. In *Computer Vision–ECCV 2016: 14th European Conference, Amsterdam, The Netherlands, October 11–14, 2016, Proceedings, Part II 14*, pages 69–85. Springer, 2016. [1](#)
- [18] Xiaohua Zhai, Basil Mustafa, Alexander Kolesnikov, and Lucas Beyer. Sigmoid loss for language image pre-training. In *Proceedings of the IEEE/CVF international conference on computer vision*, pages 11975–11986, 2023. [3](#)
